# Supplementary material for: Widowhood and Health Status Among Chinese Older Adults: The Mediation Effects of Different Types of Support
Source: Frontiers journal article supplement (doi:10.3389/fpubh.2021.745073), 2021-11-17
Supplement: Table_1.pdf [file Table_1.pdf]

## Supplementary Material

**Table A1.** Mediation effects of social support in the widowhood-health association by gender.

| Health outcomes | Female (N=4084) |                 |         | Male (N=3563) |                 |        |
|-----------------|-----------------|-----------------|---------|---------------|-----------------|--------|
|                 | Coefficient     | Bootstrap 95%CI |         | Coefficient   | Bootstrap 95%CI |        |
|                 |                 | Lower           | Upper   |               | Lower           | Upper  |
| Mental health   | -0.0710         | -0.1120         | -0.0306 | -0.0052       | -0.0441         | 0.0352 |
| Physical health | -0.0120         | -0.0217         | -0.0045 | -0.0012       | -0.0103         | 0.0073 |

*Notes:* If confidence intervals do not cross zero, then the relationship is significant; S.E.: standard errors; CI: confidence interval; Bold means not significant; Adjusted for gender, age, ethnicity, hukou, education, religion, social participation, and living arrangement.

**Table A2.** Mediation effects of social support in the widowhood-health association by rural/urban.

| Health outcomes | Rural (N=3449) |                 |         | Urban (N=4198) |                 |        |
|-----------------|----------------|-----------------|---------|----------------|-----------------|--------|
|                 | Coefficient    | Bootstrap 95%CI |         | Coefficient    | Bootstrap 95%CI |        |
|                 |                | Lower           | Upper   |                | Lower           | Upper  |
| Mental health   | -0.0468        | -0.0935         | -0.0013 | -0.0218        | -0.0546         | 0.0097 |
| Physical health | -0.0083        | -0.0182         | -0.0001 | -0.0050        | -0.0132         | 0.0023 |

*Notes:* If confidence intervals do not cross zero, then the relationship is significant; S.E.: standard errors; CI: confidence interval; Bold means not significant; Adjusted for gender, age, ethnicity, hukou, education, religion, social participation, and living arrangement.
